# Supplementary material for: Characterizing the Protein Isoforms of foraging (for), the PKGI Ortholog in Drosophila melanogaster
Source: MDPI journal article supplement (doi:10.3390/ijms241210219), 2023-06-16
Supplement: s1 [file s1]

# Characterizing the Protein Isoforms of *foraging* (*for*), the PKGI Ortholog in *Drosophila melanogaster*

Oscar E. Vasquez <sup>1,\*</sup>, Aaron M. Allen <sup>2</sup>, Anthony K.-C. So <sup>3</sup>, Quynh H. Nguyen <sup>4</sup>, Henry M. Krause <sup>5</sup>, Joel D. Levine <sup>3,6</sup> and Marla B. Sokolowski <sup>1,6,\*</sup>

<sup>1</sup> Department of Ecology and Evolutionary Biology, University of Toronto, Toronto, ON M5S 3B2, Canada

<sup>2</sup> Centre for Neural Circuits and Behaviour, Oxford University, Oxford OX1 3SR, UK; aaron.allen@dpag.ox.ac.uk

<sup>3</sup> Department of Biology, University of Toronto at Mississauga, Mississauga, ON L5L 1C6, Canada; anthony.kc.so@gmail.com (A.K.-C.S.); joel.levine@utoronto.ca (J.D.L.)

<sup>4</sup> Department of Biochemistry, University of Toronto, Toronto, ON M5S 1A8, Canada; qhuong.nguyen@mail.utoronto.ca

<sup>5</sup> Department of Molecular Genetics, University of Toronto, Toronto, ON M5S 3E1, Canada; h.krause@utoronto.ca

<sup>6</sup> Child and Brain Development Program, Canadian Institute for Advanced Research (CIFAR), Toronto, ON M5G 1M1, Canada

\* Correspondence: oscar.vasquez@utoronto.ca (O.E.V.); marla.sokolowski@utoronto.ca (M.B.S.)

## Supplemental Figures and Tables: 4

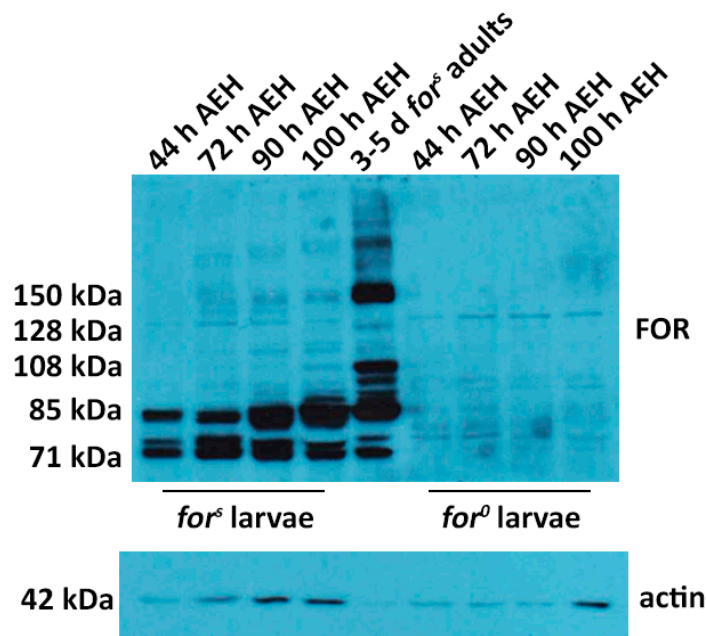

**Figure S1.** FOR expression changes through development. Western blot of FOR expression from whole-body lysates of *D. melanogaster* larvae at different developmental ages after egg hatch (AEH) and adults. FOR bands detected in second instar larvae aged 44 h AEH do not differ from those detected in mid-third instar larvae aged 72 h AEH. FOR expression changes by 90 h AEH and continues to change as larvae enter the wandering stage at 100 h AEH. FOR

expression is stable in the adult stage but is shown only for adults aged 3-5 days (d) old. Blot was probed with anti-FOR(3). Actin is presented as a loading control.

**Table S1.** Prosite analysis of FOR isoform P1 amino acid sequence.

| <b>Predicted post-translational modification</b> | <b>Enzyme</b> | <b>Amino acid residues</b> |
|--------------------------------------------------|---------------|----------------------------|
| Phosphorylation (T12)                            | PKC           | TKR (12-14)                |
| Phosphorylation (T153)                           | PKC           | TRR (153-155)              |
| Phosphorylation (S348)                           | PKC           | SLR (348-350)              |
| Phosphorylation (T465)                           | PKC           | TRK (465-467)              |
| Phosphorylation (T685)*                          | PKC           | TIK (685-687)              |
| Phosphorylation (S799)*                          | PKC           | SSR (799-801)              |
| Phosphorylation (S824)*                          | PKC           | SEK (824-826)              |
| Phosphorylation (T843)*                          | PKC           | TFK (843-845)              |
| Phosphorylation (T876)*                          | PKC           | TTR (876-878)              |
| Phosphorylation (T927)*                          | PKC           | TGR (927-929)              |
| Phosphorylation (T28)                            | CK2           | TTVD (28-31)               |
| Phosphorylation (T83)                            | CK2           | TDTD (83-86)               |
| Phosphorylation (T87)                            | CK2           | TRSE (87-90)               |
| Phosphorylation (S115)                           | CK2           | SPAE (115-118)             |
| Phosphorylation (S144)                           | CK2           | SSAE (144-147)             |
| Phosphorylation (S145)                           | CK2           | SAED (145-148)             |
| Phosphorylation (T247)                           | CK2           | THSD (247-250)             |
| Phosphorylation (S384)                           | CK2           | SPQE (384-387)             |
| Phosphorylation (S420)                           | CK2           | SHLD (420-423)             |
| Phosphorylation (T691)*                          | CK2           | TQEE (691-694)             |
| Phosphorylation (S744)*                          | CK2           | SNLD (744-747)             |
| Phosphorylation (T795)*                          | CK2           | TNGD (795-798)             |
| Phosphorylation (S824)*                          | CK2           | SEKE (824-827)             |
| Phosphorylation (T843)*                          | CK2           | TFKD (843-846)             |
| Phosphorylation (T975)*                          | CK2           | TGSD (975-978)             |
| Phosphorylation (S1058)*                         | CK2           | SVVD (1058-1061)           |
| Phosphorylation (T1063)*                         | CK2           | TNFD (1063-1066)           |
| Phosphorylation (T1081)*                         | CK2           | TGWD (1081-1084)           |
| Phosphorylation (S144)                           | PKA/PKG       | RRHS (141-144)             |
| N-linked glycosylation (N156)                    | n/a           | NDSN (156-159)             |
| N-linked glycosylation (N159)                    | n/a           | NITE (159-162)             |
| N-linked glycosylation (N193)                    | n/a           | NNTN (193-196)             |
| N-linked glycosylation (N208)                    | n/a           | NNSN (208-211)             |
| N-linked glycosylation (N772)*                   | n/a           | NLTD (772-775)             |
| N-linked glycosylation (N998)*                   | n/a           | NITR (998-1001)            |
| N-linked glycosylation (N1002)*                  | n/a           | NASN (1002-1005)           |
| N-linked glycosylation (N1045)*                  | n/a           | NCTL (1045-1048)           |

|                         |                 |                    |
|-------------------------|-----------------|--------------------|
| Phosphorylation (Y536)* | Tyrosine kinase | REIVDCMY (529-536) |
| Phosphorylation (Y849)* | Tyrosine kinase | KTFKDKKY (842-849) |

\* PTMs found in amino acid sequence shared between isoforms.

**Table S2.** Prosite analysis of FOR isoform P4 amino acid sequence.

| <b>Predicted post-translational modification</b> | <b>Enzyme</b> | <b>Amino acid residues</b> |
|--------------------------------------------------|---------------|----------------------------|
| Phosphorylation (T92)                            | PKC           | TIK (92-94)                |
| Phosphorylation (T155)                           | PKC           | TER (155-157)              |
| Phosphorylation (S168)                           | PKC           | SVK (168-170)              |
| Phosphorylation (S173)                           | PKC           | SLR (173-175)              |
| Phosphorylation (T188)                           | PKC           | TLR (188-190)              |
| Phosphorylation (T261)                           | PKC           | TVR (261-263)              |
| Phosphorylation (S284)                           | PKC           | SQR (284-286)              |
| Phosphorylation (S321)                           | PKC           | SSK (321-323)              |
| Phosphorylation (T532)*                          | PKC           | TIK (532-534)              |
| Phosphorylation (S646)*                          | PKC           | SSR (646-648)              |
| Phosphorylation (S671)*                          | PKC           | SEK (671-673)              |
| Phosphorylation (T690)*                          | PKC           | TFK (690-692)              |
| Phosphorylation (T723)*                          | PKC           | TTR (723-725)              |
| Phosphorylation (T774)*                          | PKC           | TGR (774-776)              |
| Phosphorylation (T92)                            | CK2           | TIKE (92-95)               |
| Phosphorylation (S140)                           | CK2           | SIQE (140-143)             |
| Phosphorylation (S211)                           | CK2           | SAAE (211-214)             |
| Phosphorylation (S321)                           | CK2           | SSKD (321-324)             |
| Phosphorylation (T538)*                          | CK2           | TQEE (538-541)             |
| Phosphorylation (S591)*                          | CK2           | SNLD (591-594)             |
| Phosphorylation (T642)*                          | CK2           | TNGD (642-645)             |
| Phosphorylation (S671)*                          | CK2           | SEKE (671-674)             |
| Phosphorylation (T690)*                          | CK2           | TFKD (690-693)             |
| Phosphorylation (T822)*                          | CK2           | TGSD (822-825)             |
| Phosphorylation (S905)*                          | CK2           | SVVD (905-908)             |
| Phosphorylation (T910)*                          | CK2           | TNFD (910-913)             |
| Phosphorylation (T928)*                          | CK2           | TGWD (928-931)             |
| N-linked glycosylation (N198)                    | n/a           | NLSK (198-201)             |
| N-linked glycosylation (N266)                    | n/a           | NQTT (266-269)             |
| N-linked glycosylation (N282)                    | n/a           | NASQ (282-285)             |
| N-linked glycosylation (N319)                    | n/a           | NGSS (319-322)             |
| N-linked glycosylation (N619)*                   | n/a           | NLTD (619-622)             |
| N-linked glycosylation (N845)*                   | n/a           | NITR (845-848)             |
| N-linked glycosylation (N849)*                   | n/a           | NASN (849-852)             |
| N-linked glycosylation (N892)*                   | n/a           | NCTL (892-895)             |
| Phosphorylation (S246)                           | PKA/PKG       | KRVS (243-246)             |
| Phosphorylation (S289)                           | PKA/PKG       | RRLS (286-289)             |

|                         |                 |                    |
|-------------------------|-----------------|--------------------|
| Phosphorylation (T350)  | PKA/PKG         | RRRT (247-350)     |
| Phosphorylation (Y696)* | Tyrosine kinase | KTFKDKKY (689-696) |

\* PTMs found in amino acid sequence shared between isoforms.

**Table S3.** Oligos used for recombineering of *for<sup>BAC</sup>::HA* allele.

| Oligo name    | Sequence                                                                                                            |
|---------------|---------------------------------------------------------------------------------------------------------------------|
| comTag-galK-F | ATCCTGAGGGTCCGCCGCCAGATGATGTCACTGGATGGGACAAGGACTTC                                                                  |
| comTag-galK-R | CAGAAGCGTTTAGAGAGCATCGTCTAGGAAACGGGTTCTGATTCTCCTCA                                                                  |
| com-tagHA-F   | GTCCGCCGCCAGATGATGTCACTGGATGGGACAAGGACTTCTACCCCTACGACGT<br>GCCCGAGTACGCCTGAGGAGAATCAGAACCCGTTTCCTAGACGATGCTCTCTAA   |
| com-tagHA-R   | TTAGAGAGCATCGTCTAGGAAACGGGTTCTGATTCTCCTCAGGCGTACTCGGGCAC<br>GTCGTAGGGGTAGAAGTCCTTGTCCTCCATCCAGTGACATCATCTGGCGGCGGAC |
